# Supplementary material for: Screening of the Supercritical Impregnation of Olea europaea Leaves Extract into Filaments of Thermoplastic Polyurethane (TPU) and Polylactic Acid (PLA) Intended for Biomedical Applications
Source: MDPI journal article supplement (doi:10.3390/antiox11061170), 2022-06-14
Supplement: s1 [file s1]

**Table S1.** ANOVA testing the effects of process variables and their interactions on the polymer swelling (% S) for the fractional design model. Effects were considered significant for  $p < 0.05$ .

| Factor                   | DF | SS      | MS      | F     | p-value           |
|--------------------------|----|---------|---------|-------|-------------------|
| A: Polymer               | 1  | 1510.12 | 1510.12 | 26.56 | <b>&lt;0.0001</b> |
| B: Pressure (bar)        | 2  | 96.38   | 48.19   | 0.85  | 0.4376            |
| C: Temperature (°C)      | 1  | 721.18  | 721.18  | 12.68 | <b>0.0011</b>     |
| D: Supercritical solvent | 1  | 121.09  | 121.09  | 2.13  | 0.1539            |
| AB                       | 2  | 326.51  | 163.26  | 2.87  | 0.0709            |
| AC                       | 1  | 7.24    | 7.24    | 0.13  | 0.7234            |
| AD                       | 1  | 422.17  | 422.17  | 7.43  | <b>0.0102</b>     |
| BC                       | 2  | 152.49  | 76.25   | 1.36  | 0.2755            |
| BD                       | 2  | 185.56  | 92.78   | 1.63  | 0.2110            |
| CD                       | 1  | 116.61  | 116.61  | 2.05  | 0.1615            |

DF: degrees of freedom. SS: sum of squares. MS: mean square.

**Table S2.** The least-square mean values for % Swelling with a 95.0% confidence interval

| Level                   | Count | Mean    | Std. Error | Lower Limit | Upper Limit |
|-------------------------|-------|---------|------------|-------------|-------------|
| GRAND MEAN              | 48    | 16.3307 |            |             |             |
| Polymer                 |       |         |            |             |             |
| -1                      | 24    | 10.7217 | 1.53917    | 7.59023     | 13.8532     |
| 1                       | 24    | 21.9397 | 1.53917    | 18.8082     | 25.0712     |
| Pressure                |       |         |            |             |             |
| 100                     | 16    | 14.5902 | 1.88509    | 10.755      | 18.4255     |
| 250                     | 16    | 16.3408 | 1.88509    | 12.5055     | 20.176      |
| 400                     | 16    | 18.0611 | 1.88509    | 14.2258     | 21.8963     |
| Temperature             |       |         |            |             |             |
| 35                      | 24    | 12.4545 | 1.53917    | 9.32308     | 15.586      |
| 55                      | 24    | 20.2068 | 1.53917    | 17.0754     | 23.3383     |
| Solvent                 |       |         |            |             |             |
| -1                      | 24    | 14.7424 | 1.53917    | 11.6109     | 17.8739     |
| 1                       | 24    | 17.919  | 1.53917    | 14.7875     | 21.0504     |
| Polymer by Pressure     |       |         |            |             |             |
| -1;100                  | 8     | 6.93868 | 2.66591    | 1.51482     | 12.3625     |
| -1;250                  | 8     | 9.09326 | 2.66591    | 3.66941     | 14.5171     |
| -1;400                  | 8     | 16.1331 | 2.66591    | 10.7093     | 21.557      |
| 1;100                   | 8     | 22.2418 | 2.66591    | 16.818      | 27.6657     |
| 1;250                   | 8     | 23.5883 | 2.66591    | 18.1644     | 29.0121     |
| 1;400                   | 8     | 19.989  | 2.66591    | 14.5652     | 25.4129     |
| Polymer by Temperature  |       |         |            |             |             |
| -1;35                   | 12    | 6.45702 | 2.17671    | 2.02846     | 10.8856     |
| -1;55                   | 12    | 14.9864 | 2.17671    | 10.5578     | 19.4149     |
| 1;35                    | 12    | 18.4521 | 2.17671    | 14.0235     | 22.8806     |
| 1;55                    | 12    | 25.4273 | 2.17671    | 20.9988     | 29.8559     |
| Polymer by solvent      |       |         |            |             |             |
| -1;-1                   | 12    | 12.0991 | 2.17671    | 7.67051     | 16.5276     |
| -1;1                    | 12    | 9.34431 | 2.17671    | 4.91575     | 13.7729     |
| 1;-1                    | 12    | 17.3858 | 2.17671    | 12.9572     | 21.8143     |
| 1;1                     | 12    | 26.4936 | 2.17671    | 22.0651     | 30.9222     |
| Pressure by Temperature |       |         |            |             |             |
| 100;35                  | 8     | 11.1942 | 2.66591    | 5.77039     | 16.6181     |

|                        |    |         |         |         |         |
|------------------------|----|---------|---------|---------|---------|
| 100;55                 | 8  | 17.9863 | 2.66591 | 12.5624 | 23.4101 |
| 250;35                 | 8  | 14.3675 | 2.66591 | 8.94369 | 19.7914 |
| 250;55                 | 8  | 18.314  | 2.66591 | 12.8901 | 23.7378 |
| 400;35                 | 8  | 11.8018 | 2.66591 | 6.37799 | 17.2257 |
| 400;55                 | 8  | 24.3203 | 2.66591 | 18.8964 | 29.7441 |
| Pressure by solvent    |    |         |         |         |         |
| 100;-1                 | 8  | 12.9918 | 2.66591 | 7.56792 | 18.4156 |
| 100;1                  | 8  | 16.1887 | 2.66591 | 10.7649 | 21.6126 |
| 250;-1                 | 8  | 12.3495 | 2.66591 | 6.92569 | 17.7734 |
| 250;1                  | 8  | 20.332  | 2.66591 | 14.9081 | 25.7558 |
| 400;-1                 | 8  | 18.8859 | 2.66591 | 13.4621 | 24.3098 |
| 400;1                  | 8  | 17.2362 | 2.66591 | 11.8124 | 22.6601 |
| Temperature by solvent |    |         |         |         |         |
| 35;-1                  | 12 | 12.4249 | 2.17671 | 7.99635 | 16.8535 |
| 35;1                   | 12 | 12.4842 | 2.17671 | 8.05562 | 16.9127 |
| 55;-1                  | 12 | 17.0599 | 2.17671 | 12.6313 | 21.4885 |
| 55;1                   | 12 | 23.3538 | 2.17671 | 18.9252 | 27.7823 |

**Table S3.** ANOVA testing the effects of process variables and their interactions on the ethanolic OLE loading (% OLE) and swelling degree of the impregnated samples (% S) for the fractional design model. Effects were considered significant for  $p < 0.05$ .

| Experiment | Factor              | DF | SS     | MS     | F      | p-value           |
|------------|---------------------|----|--------|--------|--------|-------------------|
| % OLE      | A: Polymer          | 1  | 26.67  | 26.67  | 105.03 | <b>&lt;0.0001</b> |
|            | B: Pressure (bar)   | 2  | 11.09  | 5.55   | 21.85  | <b>&lt;0.0001</b> |
|            | C: Temperature (°C) | 1  | 25.12  | 25.12  | 98.94  | <b>&lt;0.0001</b> |
|            | AB                  | 2  | 4.48   | 2.24   | 8.83   | <b>0.0033</b>     |
|            | AC                  | 1  | 3.52   | 3.52   | 13.85  | <b>0.0023</b>     |
|            | BC                  | 2  | 13.21  | 6.61   | 26.02  | <b>&lt;0.0001</b> |
|            |                     |    |        |        |        |                   |
| % S        | A: Polymer          | 1  | 38.70  | 39.70  | 0.36   | 0.5585            |
|            | B: Pressure (bar)   | 2  | 85.50  | 42.75  | 0.40   | 0.6798            |
|            | C: Temperature (°C) | 1  | 466.38 | 466.38 | 4.33   | 0.0563            |
|            | AB                  | 2  | 425.52 | 212.76 | 1.97   | 0.1756            |
|            | AC                  | 1  | 92.20  | 92.20  | 0.86   | 0.3706            |
|            | BC                  | 2  | 627.31 | 313.67 | 2.91   | 0.0877            |
|            |                     |    |        |        |        |                   |

DF: degrees of freedom. SS: sum of squares. MS: mean square.

**Table S4.** The least-square mean values for % OLE with a 95.0% confidence interval

| Level       | Count | Mean    | Std. Error | Lower Limit | Upper Limit |
|-------------|-------|---------|------------|-------------|-------------|
| GRAND MEAN  | 24    | 2.18805 |            |             |             |
| Polymer     |       |         |            |             |             |
| -1          | 12    | 1.1339  | 0.145466   | 0.821906    | 1.44589     |
| 1           | 12    | 3.2422  | 0.145466   | 2.93021     | 3.5542      |
| Pressure    |       |         |            |             |             |
| 100         | 8     | 1.24468 | 0.178158   | 0.862562    | 1.62679     |
| 250         | 8     | 2.82088 | 0.178158   | 2.43876     | 3.20299     |
| 400         | 8     | 2.49861 | 0.178158   | 2.11649     | 2.88072     |
| Temperature |       |         |            |             |             |

|                         |    |          |          |            |          |
|-------------------------|----|----------|----------|------------|----------|
| 35                      | 12 | 1.16492  | 0.145466 | 0.852923   | 1.47691  |
| 55                      | 12 | 3.21119  | 0.145466 | 2.89919    | 3.52318  |
| Polymer by Pressure     |    |          |          |            |          |
| -1;100                  | 4  | 0.3718   | 0.251954 | -0.168589  | 0.912189 |
| -1;250                  | 4  | 1.17058  | 0.251954 | 0.630186   | 1.71096  |
| -1;400                  | 4  | 1.85933  | 0.251954 | 1.31894    | 2.39971  |
| 1;100                   | 4  | 2.11755  | 0.251954 | 1.57716    | 2.65794  |
| 1;250                   | 4  | 4.47117  | 0.251954 | 3.93079    | 5.01156  |
| 1;400                   | 4  | 3.13789  | 0.251954 | 2.5975     | 3.67828  |
| Polymer by Temperature  |    |          |          |            |          |
| -1;35                   | 6  | 0.4935   | 0.20572  | 0.0522744  | 0.934726 |
| -1;55                   | 6  | 1.7743   | 0.20572  | 1.33307    | 2.21553  |
| 1;35                    | 6  | 1.83633  | 0.20572  | 1.39511    | 2.27756  |
| 1;55                    | 6  | 4.64808  | 0.20572  | 4.20685    | 5.0893   |
| Pressure by Temperature |    |          |          |            |          |
| 100;35                  | 4  | 0.944475 | 0.251954 | 0.404086   | 1.48486  |
| 100;55                  | 4  | 1.54487  | 0.251954 | 1.00449    | 2.08526  |
| 250;35                  | 4  | 2.09503  | 0.251954 | 1.55464    | 2.63541  |
| 250;55                  | 4  | 3.54673  | 0.251954 | 3.00634    | 4.08711  |
| 400;35                  | 4  | 0.45525  | 0.251954 | -0.0851388 | 0.995639 |
| 400;55                  | 4  | 4.54196  | 0.251954 | 4.00158    | 5.08235  |

---
